# Supplementary material for: Feedback activation of neurofibromin terminates growth factor-induced Ras activation
Source: PubMed Central journal article supplement (PMC4746934; doi:10.1186/s12964-016-0128-z), 2016-02-09

# Figure S1

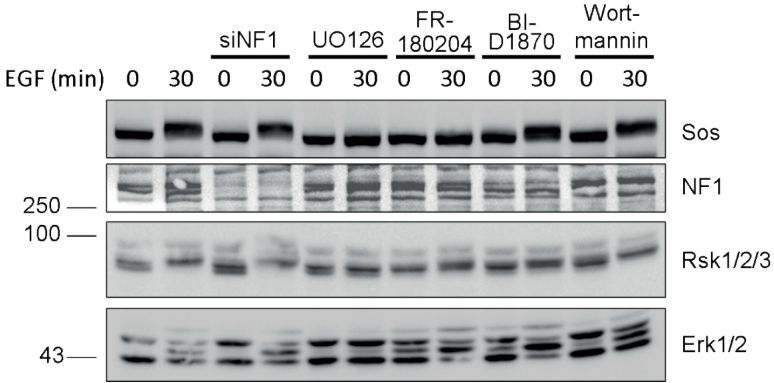

Supplement: 12964_2016_128_MOESM1_ESM.pdf [file 12964_2016_128_MOESM1_ESM.pdf]
